# Supplementary material for: Climatic and topographic changes since the Miocene influenced the diversification and biogeography of the tent tortoise (Psammobates tentorius) species complex in Southern Africa
Source: BMC Evol Biol. 2020 Nov 13;20:153. doi: 10.1186/s12862-020-01717-1 (PMC7666511; doi:10.1186/s12862-020-01717-1)
Supplement: Supplementary file 2 — Additional file 2: Table S1. The sequence polymorphisms of all genes used in this study, including fragment length (bp), number of variable sites, variable site percentage, parsimony informative sites, and the percentage of parsimony informative sites. [file 12862_2020_1717_MOESM2_ESM.xlsx]

## Sheet: Sheet1
	Table S1.The sequence polymorphisms of all genes used in this study, including fragment length (bp), number of variable sites, variable site percentage, parsimony informative sites, and the percentage of parsimony informative sites.
	Loci	fragment length	No. variable site	variable site %	parsimony informative site	parsimony informative %
	12S	407	25	0.0614251	24	0.0589681
	16S	539	26	0.0482375	23	0.0426716
	Cyt-b	693	130	0.18759	120	0.17316
	ND4	678	91	0.134218	79	0.116519
	tRNA-His & tRNA-Ser	120	12	0.1	10	0.0833333
	PRLR	525	15	0.0285714	15	0.0285714
