# Supplementary material for: Climatic and topographic changes since the Miocene influenced the diversification and biogeography of the tent tortoise (Psammobates tentorius) species complex in Southern Africa
Source: BMC Evol Biol. 2020 Nov 13;20:153. doi: 10.1186/s12862-020-01717-1 (PMC7666511; doi:10.1186/s12862-020-01717-1)
Supplement: Supplementary file 4 — Additional file 4: Table S10. The climatic variables that made significant impacts in each group across different periods (group abbreviations as in Table S6) from the ENM analyses. [file 12862_2020_1717_MOESM4_ESM.xlsx]

## Sheet: Sheet1
		Table S10. The climatic variables that made significant impacts in each group across different periods (group abbreviations as in Table S6) from the ENM analyses.
		All	Variable	LIG	LGM	MIDH	Current	Future
			Bio 1	34.6	6.9	22.7	14	15.6
			Bio 4	10.3	30.6	2.6	2.8	2.3
			Bio 12	45.3	30	45.5	50.9	52.3
		Ptt-B	Variable	LIG	LGM	MIDH	Current	Future
			Bio 8	8.6	5.6	21.1	3.8	23
			Bio 12	28.8	18.7	32.8	33.1	30
			Bio 19	17.6	34.5	35.3	51.4	36
		Pv-B	Variable	LIG	LGM	MIDH	Current	Future
			Bio 4	57.8	54	52.6	34.7	37.4
			Bio 12	23.6	23.4	18.7	33.3	31.8
			Bio 19	0.4	15.4	0.1	22.2	22.1
		Ptr	Variable	LIG	LGM	MIDH	Current	Future
			Bio 4	1.5	10.3	13.9	10.1	10
			Bio 8	30.7	46.2	48.2	51.5	54.9
			Bio 9	9.9	25.3	19.8	18.6	13.8
			Bio 12	30.5	18	16.5	19.4	18.2
		Ptt-C	Variable	LIG	LGM	MIDH	Current	Future
			Bio 4	7	16.4	5.3	14.3	14.9
			Bio 8	59.1	70.7	80.8	32.6	42.3
			Bio 12	19	3.9	5	9.5	12.4
			Bio 19	12.9	0.1	3.1	32.4	24.5
		Ptt-A	Variable	LIG	LGM	MIDH	Current	Future
			Bio 8	21.7	3.6	18.1	2.5	5.6
			Bio 9	6.8	33	14.9	19.2	17.8
			Bio 19	54	31.5	55.9	66.3	58
		Pv-A	Variable	LIG	LGM	MIDH	Current	Future
			Bio 4	14.5	27.4	10.6	6.4	13.8
			Bio 12	71.9	63.1	67.6	70.4	72.7
		Ptt-D	Variable	LIG	LGM	MIDH	Current	Future
			Bio 8	23.5	21.3	30.9	12.2	24.7
			Bio 9	11.4	25.4	39	6.2	0
			Bio 12	26.5	19.1	12.9	33.6	35.8
			Bio 19	26.8	21.4	10.8	46	37.2
