# Supplementary material for: Climatic and topographic changes since the Miocene influenced the diversification and biogeography of the tent tortoise (Psammobates tentorius) species complex in Southern Africa
Source: BMC Evol Biol. 2020 Nov 13;20:153. doi: 10.1186/s12862-020-01717-1 (PMC7666511; doi:10.1186/s12862-020-01717-1)
Supplement: Supplementary file 9 — Additional file 9: Table S18. The bioclimatic variables and their percentage contribution, permutation importance and jack-knife test AUC’s used in the ENM to determine suitable habitat ranges of the P. tentorius species complex. Variables with AUC above 0.75 were considered as potentially useful (given in bold). [file 12862_2020_1717_MOESM9_ESM.xlsx]

## Sheet: Sheet1
													Table S18. The bioclimatic variables and their percentage contribution, permutation importance and jackknife test's AUC used for ENM the suitable habitat range of P. tentorius species complex in this study. Variables with AUC above 0.75 were considered potentially useful (given in bold).
						Climatic period
						LIG			LGM			MIDH			Current			Future
		Data source	Category	Variables	Abbreviation	Percentage	Permutation	Jackknife	Percentage	Permutation	Jackknife	Percentage	Permutation	Jackknife	Percentage	Permutation	Jackknife	Percentage	Permutation	Jackknife
						contribution	importance	AUC	contribution	importance	AUC	contribution	importance	AUC	contribution	importance	AUC	contribution	importance	AUC
		Ptt-B
		WorldClim	Bioclimatic	Annual mean temperature	Bio 1	2.2	0.2	0.78	18.4	2.4	0.78	0	0	0.73	5.2	0	0.77	0.1	0.3	0.82
				Isothermality (BIO2/BIO7) (* 100)	Bio 3	4.2	3.4	0.75	0.5	1.1	0.75	0	0	0.67	0.1	0.2	0.66	0.3	1.7	0.61
				Temperature Seasonality (standard deviation *100)	Bio 4	7.3	14.8	0.62	21.7	6.6	0.68	5.9	2.7	0.67	1.9	1.4	0.62	4.5	5.7	0.63
				Mean temperature of wettest quarter	Bio 8	8.6	0.1	0.72	5.6	4	0.67	21.1	2.5	0.82	3.8	1.4	0.75	23	10.6	0.83
				Mean Temperature of Driest Quarter	Bio 9	31.3	29	0.8	0.6	0.4	0.66	4.9	1.6	0.68	4.6	2.1	0.67	6.1	2	0.76
				Annual precipitation	Bio 12	28.8	35	0.79	18.7	25.2	0.77	32.8	45.2	0.76	33.1	36.6	0.75	30	40.3	0.74
				Precipitation of Coldest Quarter	Bio 19	17.6	17.5	0.72	34.5	60.3	0.85	35.3	47.9	0.83	51.4	58.3	0.87	36	39.4	0.87
		Pv-B
		WorldClim	Bioclimatic	Annual mean temperature	Bio 1	9.2	14.4	0.77	1.3	1.5	0.79	0.5	1.6	0.77	0.5	3.7	0.76	0.2	0.2	0.71
				Isothermality (BIO2/BIO7) (* 100)	Bio 3	1.5	14.5	0.79	1.3	3	0.9	8.5	24.5	0.9	6.2	14.3	0.89	0.3	1.1	0.86
				Temperature Seasonality (standard deviation *100)	Bio 4	57.8	16	0.9	54	11.8	0.91	52.6	14.4	0.88	34.7	2.2	0.86	37.4	15.3	0.84
				Mean temperature of wettest quarter	Bio 8	5.7	2.1	0.67	0.9	3.7	0.7	17.5	2.7	0.73	0.1	0.7	0.69	5.9	1.4	0.7
				Mean Temperature of Driest Quarter	Bio 9	1.7	0.6	0.81	3.7	6	0.84	2.1	1	0.72	3.1	0.6	0.8	2.2	1.8	0.75
				Annual precipitation	Bio 12	23.6	51.1	0.89	23.4	55.4	0.9	18.7	55.3	0.87	33.3	65.3	0.88	31.8	61.4	0.87
				Precipitation of Coldest Quarter	Bio 19	0.4	1.4	0.66	15.4	18.6	0.8	0.1	0.5	0.61	22.2	13.2	0.77	22.1	18.8	0.78
		Ptr
		WorldClim	Bioclimatic	Annual mean temperature	Bio 1	0	0	0.74	0	0.1	0.71	0	1.2	0.72	0	0.3	0.7	0.2	2.8	0.76
				Isothermality (BIO2/BIO7) (* 100)	Bio 3	17.9	11.3	0.89	0.2	0.5	0.75	1.6	0.7	0.81	0.4	0	0.83	1.4	0	0.87
				Temperature Seasonality (standard deviation *100)	Bio 4	1.5	0.3	0.67	10.3	6.8	0.65	13.9	10.3	0.77	10.1	7.5	0.77	10	8.5	0.8
				Mean temperature of wettest quarter	Bio 8	30.7	1.3	0.93	46.2	42.9	0.98	48.2	48.4	0.98	51.5	10.9	0.97	54.9	77.7	0.97
				Mean Temperature of Driest Quarter	Bio 9	9.9	0.9	0.78	25.3	9.1	0.92	19.8	11.8	0.92	18.6	11.8	0.92	13.8	9.8	0.9
				Annual precipitation	Bio 12	30.5	78.9	0.88	18	40.6	0.9	16.5	27.5	0.88	19.4	69.5	0.92	18.2	0	0.93
				Precipitation of Coldest Quarter	Bio 19	9.6	7.3	0.83	0	0	0.88	0	0	0.86	0	0	0.86	1.4	1.1	0.87
		Ptt-C
		WorldClim	Bioclimatic	Annual mean temperature	Bio 1	0	0	0.88	5.6	19.2	0.91	2.5	0	0.88	5.1	18.4	0.88	2.5	6.3	0.87
				Isothermality (BIO2/BIO7) (* 100)	Bio 3	1.8	13.8	0.92	2.4	18.3	0.66	3	2	0.73	4.5	13.4	0.76	2	5.2	0.8
				Temperature Seasonality (standard deviation *100)	Bio 4	7	27.3	0.91	16.4	49.6	0.77	5.3	7	0.87	14.3	42.3	0.88	14.9	20.8	0.86
				Mean temperature of wettest quarter	Bio 8	59.1	45.9	0.98	70.7	8.9	0.97	80.8	89.3	0.98	32.6	0.3	0.96	42.3	2.5	0.96
				Mean Temperature of Driest Quarter	Bio 9	0.1	0.3	0.8	0.8	1	0.72	0.2	0.3	0.83	1.6	0.3	0.83	1.4	0.1	0.79
				Annual precipitation	Bio 12	19	10	0.92	3.9	2.9	0.87	5	1.4	0.9	9.5	13.8	0.92	12.4	36.8	0.92
				Precipitation of Coldest Quarter	Bio 19	12.9	2.8	0.86	0.1	0	0.92	3.1	0	0.93	32.4	11.5	0.94	24.5	28.3	0.92
		Ptt-A
		WorldClim	Bioclimatic	Annual mean temperature	Bio 1	2.5	3.9	0.86	8.1	15.1	0.8	3.4	29.1	0.81	6.5	31.9	0.82	13.1	40.4	0.88
				Isothermality (BIO2/BIO7) (* 100)	Bio 3	0.1	0	0.67	3.1	1.1	0.64	1.9	0	0.46	0	0	0.46	0	0.1	0.5
				Temperature Seasonality (standard deviation *100)	Bio 4	1.7	1.5	0.86	20.4	19.7	0.72	4.4	1.8	0.48	0.5	1	0.49	0.1	0.2	0.71
				Mean temperature of wettest quarter	Bio 8	21.7	15.8	0.96	3.6	2.6	0.57	18.1	2.4	0.95	2.5	5.2	0.89	5.6	1.1	0.94
				Mean Temperature of Driest Quarter	Bio 9	6.8	4.4	0.73	33	50.8	0.92	14.9	54.7	0.92	19.2	35.1	0.92	17.8	48.9	0.9
				Annual precipitation	Bio 12	13.1	0.1	0.8	0.3	0.6	0.66	1.3	3.6	0.5	4.9	5.2	0.56	5.3	3.6	0.54
				Precipitation of Coldest Quarter	Bio 19	54	74.3	0.98	31.5	10.1	0.98	55.9	8.3	0.98	66.3	21.5	0.97	58	5.6	0.98
		Pv-A
		WorldClim	Bioclimatic	Annual mean temperature	Bio 1	1.6	0.4	0.64	0.8	0.3	0.67	8.7	20.2	0.66	6.8	16	0.64	0	0	0.61
				Isothermality (BIO2/BIO7) (* 100)	Bio 3	0.2	1.2	0.79	1.7	4	0.72	3.8	0.2	0.62	8.2	0.2	0.62	0.3	0.4	0.62
				Temperature Seasonality (standard deviation *100)	Bio 4	14.5	2.6	0.78	27.4	1.2	0.76	10.6	8.7	0.67	6.4	3.1	0.64	13.8	2.9	0.61
				Mean temperature of wettest quarter	Bio 8	0	0	0.5	0	0.1	0.53	6.1	6.5	0.52	6.1	8.3	0.32	0.4	2.2	0.4
				Mean Temperature of Driest Quarter	Bio 9	0.6	0.3	0.65	5	3.8	0.77	3.1	0	0.72	1.9	0.9	0.69	10.4	3.1	0.69
				Annual precipitation	Bio 12	71.9	95.5	0.97	63.1	89.5	0.95	67.6	62.2	0.96	70.4	69.2	0.95	72.7	87.6	0.96
				Precipitation of Coldest Quarter	Bio 19	11.2	0	0.89	2	1.2	0.74	0.1	2.1	0.76	0.2	2.2	0.62	2.3	3.9	0.76
		Ptt-D
		WorldClim	Bioclimatic	Annual mean temperature	Bio 1	10.8	8.9	0.93	1.1	1.5	0.95	6	19.1	0.96	0.9	0.1	0.96	1.7	1	0.84
				Isothermality (BIO2/BIO7) (* 100)	Bio 3	0.1	0	0.66	0.5	0	0.71	0.1	0	0.62	0.5	0.2	0.47	0.2	0	0.46
				Temperature Seasonality (standard deviation *100)	Bio 4	0.8	0.4	0.84	11.3	0	0.83	0.4	0	0.8	0.7	0.3	0.85	0.4	0.2	0.86
				Mean temperature of wettest quarter	Bio 8	23.5	32.4	0.97	21.3	30	0.95	30.9	5.3	0.98	12.2	1.2	0.92	24.7	0.7	0.99
				Mean Temperature of Driest Quarter	Bio 9	11.4	9.8	0.87	25.4	15.1	0.93	39	62.5	0.96	6.2	5.1	0.87	0	0	0.62
				Annual precipitation	Bio 12	26.5	25.4	0.97	19.1	42	0.95	12.9	13	0.96	33.6	64.6	0.96	35.8	75.4	0.97
				Precipitation of Coldest Quarter	Bio 19	26.8	23.1	0.94	21.4	11.2	0.96	10.8	0.1	0.96	46	28.5	0.97	37.2	22.6	0.96
		All clades
		WorldClim	Bioclimatic	Annual mean temperature	Bio 1	34.6	28.2	0.76	6.9	19.6	0.77	22.7	11.8	0.76	14	26.9	0.75	15.6	17	0.76
				Isothermality (BIO2/BIO7) (* 100)	Bio 3	1.7	3	0.64	2	0.1	0.75	3.8	4.6	0.69	1.9	1.5	0.66	0.9	0.3	0.62
				Temperature Seasonality (standard deviation *100)	Bio 4	10.3	0.4	0.75	30.6	7.9	0.77	2.6	2.2	0.69	2.8	1.5	0.66	2.3	2.3	0.64
				Mean temperature of wettest quarter	Bio 8	2	0.2	0.72	24.7	2.9	0.72	17.8	2.5	0.78	2.9	4.1	0.75	3.4	0.2	0.76
				Mean Temperature of Driest Quarter	Bio 9	1.1	1.5	0.7	1.1	0.7	0.71	1.7	2.4	0.7	1.4	1	0.69	0.5	0.4	0.68
				Annual precipitation	Bio 12	45.3	59.2	0.82	30	52.8	0.83	45.5	66.2	0.82	50.9	49.3	0.82	52.3	67.1	0.82
				Precipitation of Coldest Quarter	Bio 19	4.9	7.5	0.43	4.8	16	0.73	5.8	10.3	0.66	26	15.7	0.73	25	12.7	0.73
